# Supplementary material for: Chloroplast and nuclear DNA exchanges among Begonia sect. Baryandra species (Begoniaceae) from Palawan Island, Philippines, and descriptions of five new species
Source: PubMed Central journal article supplement (PMC5931476; doi:10.1371/journal.pone.0194877), 2018-05-02
Supplement: pone.0194877.s001.pdf [file pone.0194877.s001.pdf]

| Tip label            | Taxon                                                     | ndhA intron | ndhF-rpl32 | rpl32-trnL | trnC-ycf6 | ycf6-psbM | psbM-trnD | ITS      | Voucher                  |
|----------------------|-----------------------------------------------------------|-------------|------------|------------|-----------|-----------|-----------|----------|--------------------------|
| B. acclivis1         | <i>B. acclivis</i> Coyle                                  | ---         | ---        | ---        | ---       | ---       | ---       | ---      | Peng 24565 (HAST)        |
| B. acclivis2         | <i>B. acclivis</i> Coyle                                  | ---         | ---        | ---        | ---       | ---       | ---       | ---      | Peng 24575 (HAST)        |
| B. acuminatissima    | <i>B. acuminatissima</i> Merr.                            | KR186445    | KR186532   | KR186706   | KR186792  | KR186879  | KR186619  | KR186965 | Rubite R321 (PNH)        |
| B. aff. gueritziana  | <i>B. aff. gueritziana</i> Gibbs                          | KR186446    | KR186533   | KR186707   | KR186793  | KR186880  | KR186620  | KR186966 | Peng P22344 (HAST)       |
| B. albococcinea      | <i>B. albococcinea</i> Hook.                              | KR186447    | KR186534   | KR186708   | KR186794  | KR186881  | KR186621  | no data  | Peng P23302 (HAST)       |
| B. anisoptera        | <i>B. anisoptera</i> Merr.                                | KR186448    | KR186535   | KR186709   | KR186795  | KR186882  | KR186622  | JX656720 | Rubite R479 (PNH)        |
| B. biliranensis      | <i>B. biliranensis</i> Merr.                              | KR186449    | KR186536   | KR186710   | KR186796  | KR186883  | KR186623  | KR186967 | Rubite R311 (PNH)        |
| B. blancii           | <i>B. blancii</i> M. Hughes & C.-I Peng                   | KR186450    | KR186537   | KR186711   | KR186797  | KR186884  | KR186624  | KR186968 | Peng P22545 (HAST)       |
| B. bonthainensis     | <i>B. bonthainensis</i> Hensl.                            | KR186451    | KR186538   | KR186712   | KR186798  | KR186885  | KR186625  | no data  | Peng P22531 (HAST)       |
| B. calcolca          | <i>B. calcolca</i> Merr.                                  | KR186452    | KR186539   | KR186713   | KR186799  | KR186886  | KR186626  | JX656708 | Peng P20761 (HAST)       |
| B. camiguinensis     | <i>B. camiguinensis</i> Elmer                             | KR186453    | KR186540   | KR186714   | KR186800  | KR186887  | KR186627  | JX656721 | Rubite R506 (PNH)        |
| B. cf. nigritarum    | <i>B. cf. nigritarum</i> (Kamel) Steud.                   | ---         | ---        | ---        | ---       | ---       | ---       | ---      | Peng 24591 (HAST)        |
| B. chingipengii      | <i>B. chingipengii</i> Rubite                             | KR186455    | KR186542   | KR186716   | KR186802  | KR186889  | KR186629  | KR186970 | Peng P23368 (HAST)       |
| B. chloroneura       | <i>B. chloroneura</i> P.Wilkie & Sands                    | KR186456    | KR186543   | KR186717   | KR186803  | KR186890  | KR186630  | KR186971 | Wilkie et al., 29015 (E) |
| B. cleopatras        | <i>B. cleopatras</i> Coyle                                | KR186457    | KR186544   | KR186718   | KR186804  | KR186891  | KR186631  | KR186972 | Wilkie et al., 25373 (E) |
| B. culasiensis1      | <i>B. culasiensis</i> ined.                               | KR186458    | KR186545   | no data    | KR186805  | KR186892  | KR186632  | KR186973 | Peng P23793 (HAST)       |
| B. culasiensis2      | <i>B. culasiensis</i> ined.                               | KR186459    | KR186546   | KR186719   | KR186806  | KR186893  | KR186633  | KR186974 | Rubite R234 (PNH)        |
| B. dipetala          | <i>B. dipetala</i> Graham                                 | KR186460    | KR186547   | KR186720   | KR186807  | KR186894  | KR186634  | no data  | Peng P22520 (HAST)       |
| B. dregei            | <i>B. dregei</i> Otto & A.Dietr.                          | KR186461    | KR186548   | KR186721   | KR186808  | KR186895  | KR186635  | no data  | Peng P20868 (HAST)       |
| B. elmeri            | <i>B. elmeri</i> Merr.                                    | KR186462    | KR186549   | KR186722   | KR186809  | KR186896  | KR186636  | JX656714 | Rubite R319 (PNH)        |
| B. elnidoensis       | <i>B. elnidoensis</i> C.-I Peng, R. Rubite & C. W. Lin    | KR186463    | KR186550   | KR186723   | KR186810  | KR186897  | KR186637  | KR186976 | Peng P23508 (HAST)       |
| B. fenecis1          | <i>B. fenecis</i> Merr.                                   | KR186464    | KR186551   | KR186724   | KR186811  | KR186898  | KR186638  | KR186977 | Peng P10794 (HAST)       |
| B. fenecis2          | <i>B. fenecis</i> Merr.                                   | KR186465    | KR186552   | KR186725   | KR186812  | KR186899  | KR186639  | KR186978 | Unkn. NK11979 (HAST)     |
| B. floccifera        | <i>B. floccifera</i> Beed.                                | KR186466    | KR186553   | KR186726   | KR186813  | KR186900  | KR186640  | no data  | Peng P21216 (HAST)       |
| B. forbesii          | <i>B. forbesii</i> King                                   | KR186467    | KR186554   | KR186727   | KR186814  | KR186901  | KR186641  | JX656704 | Peng P22685 (HAST)       |
| B. foxworthyi        | <i>B. foxworthyi</i> Burkill ex Ridl.                     | KR186468    | KR186555   | KR186728   | KR186815  | KR186902  | KR186642  | JX656702 | Peng P22721 (HAST)       |
| B. gabaldonensis     | <i>B. gabaldonensis</i> ined.                             | KR186469    | KR186556   | KR186729   | KR186816  | KR186903  | KR186643  | no data  | Peng P23356 (HAST)       |
| B. gironellae1       | <i>B. gironellae</i> C.-I Peng, R. Rubite & C. W. Lin     | ---         | ---        | ---        | ---       | ---       | ---       | ---      | Peng 24579 (HAST)        |
| B. gironellae2       | <i>B. gironellae</i> C.-I Peng, R. Rubite & C. W. Lin     | ---         | ---        | ---        | ---       | ---       | ---       | ---      | Peng 24581 (HAST)        |
| B. gironellae3       | <i>B. gironellae</i> C.-I Peng, R. Rubite & C. W. Lin     | ---         | ---        | ---        | ---       | ---       | ---       | ---      | Peng 24580 (HAST)        |
| B. gueritziana1      | <i>B. gueritziana</i> Gibbs                               | KR186471    | KR186558   | KR186731   | KR186818  | KR186905  | KR186645  | KR186980 | Peng P22311 (HAST)       |
| B. gueritziana2      | <i>B. gueritziana</i> Gibbs                               | KR186472    | KR186559   | KR186732   | KR186819  | KR186906  | KR186646  | KR186981 | Peng P22342 (HAST)       |
| B. gutierrezii1      | <i>B. gutierrezii</i> Coyle                               | KR186473    | KR186560   | KR186733   | KR186820  | KR186907  | KR186647  | KR186982 | Blanc s.n. (E)           |
| B. gutierrezii2      | <i>B. gutierrezii</i> Coyle                               | ---         | ---        | ---        | ---       | ---       | ---       | ---      | Peng 24534 (HAST)        |
| B. hernandioides1    | <i>B. hernandioides</i> Merr.                             | KR186474    | KR186561   | KR186734   | KR186821  | KR186908  | KR186648  | KR186983 | Peng P21006 (HAST)       |
| B. hernandioides2    | <i>B. hernandioides</i> Merr.                             | KR186475    | KR186562   | KR186735   | KR186822  | KR186909  | KR186649  | no data  | Rubite R106 (PNH)        |
| B. hughesii1         | <i>B. hughesii</i> R. Rubite & C.-I Peng                  | KR186476    | KR186563   | KR186736   | KR186823  | KR186910  | KR186650  | KR186984 | Peng P23466 (HAST)       |
| B. hughesii2         | <i>B. hughesii</i> R. Rubite & C.-I Peng                  | KR186477    | KR186564   | KR186737   | KR186824  | KR186911  | KR186651  | KR186985 | Peng P23475 (HAST)       |
| B. ignorata          | <i>B. ignorata</i> Irmisch.                               | KR186478    | KR186565   | KR186738   | KR186825  | KR186912  | KR186652  | no data  | Peng P22725 (HAST)       |
| B. kingiana          | <i>B. kingiana</i> Irmisch.                               | KR186479    | KR186566   | KR186739   | KR186826  | KR186913  | KR186653  | no data  | Peng P21226 (HAST)       |
| B. klemmei           | <i>B. klemmei</i> Merr.                                   | KR186480    | KR186567   | KR186740   | KR186827  | KR186914  | KR186654  | JX656709 | Rubite R182 (PNH)        |
| B. laruei            | <i>B. laruei</i> M. Hughes                                | KR186481    | KR186568   | KR186741   | KR186828  | KR186915  | KR186655  | no data  | Hughes MH1398 (E)        |
| B. longiscapa1       | <i>B. longiscapa</i> Warb.                                | KR186482    | KR186569   | KR186742   | KR186829  | KR186916  | KR186656  | KR186986 | Rubite R298 (PNH)        |
| B. longiscapa2       | <i>B. longiscapa</i> Warb.                                | KR186483    | KR186570   | KR186743   | KR186830  | KR186917  | KR186657  | KR186987 | Rubite R309 (PNH)        |
| B. luzonensis        | <i>B. luzonensis</i> Warb.                                | KR186484    | KR186571   | KR186744   | KR186831  | KR186918  | KR186658  | KR186988 | Rubite R316 (PNH)        |
| B. luzonensis2       | <i>B. luzonensis</i> Warb.                                | KR186485    | KR186572   | KR186745   | KR186832  | KR186919  | KR186659  | KR186989 | Rubite 420 (PNH)         |
| B. manillensis       | <i>B. manillensis</i> A.D.C.                              | KR186486    | KR186573   | KR186746   | KR186833  | KR186920  | KR186660  | KR186990 | Rubite R256 (PNH)        |
| B. masoniana         | <i>B. masoniana</i> Irmisch.                              | KR186487    | KR186574   | KR186747   | KR186834  | KR186921  | KR186661  | no data  | Peng P21411 (HAST)       |
| B. merrilliana       | <i>B. merrilliana</i> ined.                               | KR186488    | KR186575   | KR186748   | KR186835  | KR186922  | KR186662  | KR186991 | Peng P23765 (HAST)       |
| B. mindorensis1      | <i>B. mindorensis</i> Merr.                               | KR186489    | KR186576   | KR186749   | KR186836  | KR186923  | KR186663  | KR186992 | Rubite R326 (PNH)        |
| B. mindorensis2      | <i>B. mindorensis</i> Merr.                               | KR186490    | KR186577   | KR186750   | KR186837  | KR186924  | KR186664  | KR187002 | Peng P23456 (HAST)       |
| B. mindorensis3      | <i>B. mindorensis</i> Merr.                               | ---         | ---        | ---        | ---       | ---       | ---       | ---      | Peng 24572 (HAST)        |
| B. mindorensis4      | <i>B. mindorensis</i> Merr.                               | ---         | ---        | ---        | ---       | ---       | ---       | ---      | Peng 24586 (HAST)        |
| B. nelumbifolia      | <i>B. nelumbifolia</i> Schldt. & Cham.                    | KR186491    | KR186578   | KR186751   | KR186838  | KR186925  | KR186665  | no data  | Peng P20879 (HAST)       |
| B. nigritarum1       | <i>B. nigritarum</i> (Kamel) Steud.                       | KR186492    | KR186579   | KR186752   | KR186839  | KR186926  | KR186666  | JX656719 | Rubite R419 (PNH)        |
| B. nigritarum2       | <i>B. nigritarum</i> (Kamel) Steud.                       | KR186493    | KR186580   | KR186753   | KR186840  | KR186927  | KR186667  | KR186996 | Peng P23855 (HAST)       |
| B. nigritarum3       | <i>B. nigritarum</i> (Kamel) Steud.                       | KR186494    | KR186581   | KR186754   | KR186841  | KR186928  | KR186668  | no data  | Peng P23372 (HAST)       |
| B. nigritarum4       | <i>B. nigritarum</i> (Kamel) Steud.                       | KR186495    | KR186582   | KR186755   | KR186842  | KR186929  | KR186669  | no data  | Peng P23373 (HAST)       |
| B. nigritarum5       | <i>B. nigritarum</i> (Kamel) Steud.                       | KR186496    | KR186583   | KR186756   | KR186843  | KR186930  | KR186670  | KR186997 | Peng P23451 (HAST)       |
| B. nigritarum6       | <i>B. nigritarum</i> (Kamel) Steud.                       | KR186497    | KR186584   | KR186757   | KR186844  | KR186931  | KR186671  | KR186998 | Peng P23372 (HAST)       |
| B. nigritarum7       | <i>B. nigritarum</i> (Kamel) Steud.                       | KR186498    | KR186585   | KR186758   | KR186845  | KR186932  | KR186672  | KR187000 | Peng P23586 (HAST)       |
| B. ningmingensis     | <i>B. ningmingensis</i> D. Fang, Y. G. Wei & C.-I Peng    | KR186499    | KR186586   | KR186759   | KR186846  | KR186933  | KR186673  | KR187001 | Peng P23358 (HAST)       |
| B. obtusifolia       | <i>B. obtusifolia</i> Merr.                               | KR186500    | KR186587   | KR186760   | KR186847  | KR186934  | KR186674  | no data  | Peng P20322 (HAST)       |
| B. oxysperma1        | <i>B. oxysperma</i> A.D.C.                                | KR186501    | KR186588   | KR186761   | KR186848  | KR186935  | KR186675  | KR186993 | Peng P23828 (HAST)       |
| B. oxysperma2        | <i>B. oxysperma</i> A.D.C.                                | KR186502    | KR186589   | KR186762   | KR186849  | KR186936  | KR186676  | JX656710 | Rubite R213 (PNH)        |
| B. palawanensis      | <i>B. palawanensis</i> Merr.                              | KR186503    | KR186590   | KR186763   | KR186850  | KR186937  | KR186677  | KR186994 | Peng P23015 (HAST)       |
| B. quinquealata      | <i>B. quinquealata</i> C.-I Peng, R. Rubite & C. W. Lin   | KR186504    | KR186591   | KR186764   | KR186851  | KR186938  | KR186678  | no data  | Peng P23453 (HAST)       |
| B. rubitae           | <i>B. rubitae</i> M. Hughes                               | ---         | ---        | ---        | ---       | ---       | ---       | ---      | Peng 24588 (HAST)        |
| B. rufipila          | <i>B. rufipila</i> Merr.                                  | KR186505    | KR186592   | KR186765   | KR186852  | KR186939  | KR186679  | KF636465 | Rubite R356 (PNH)        |
| B. sp2               | <i>B. sp. sect. Baryandra</i>                             | KR186506    | KR186593   | KR186766   | KR186853  | KR186940  | KR186680  | JX656712 | Rubite R265 (PNH)        |
| B. sp3               | <i>B. sp. sect. Baryandra</i>                             | KR186507    | KR186594   | KR186767   | KR186854  | KR186941  | KR186681  | no data  | Rubite R98 (PNH)         |
| B. sp4               | <i>B. sp. sect. Baryandra</i>                             | KR186508    | KR186595   | KR186768   | KR186855  | KR186942  | KR186682  | KR187004 | Rubite R136 (PNH)        |
| B. sp6               | <i>B. sp. sect. Baryandra</i>                             | KR186509    | KR186596   | KR186769   | KR186856  | KR186943  | KR186683  | KR187005 | Rubite R290 (PNH)        |
| B. sp8(1)            | <i>B. sp. sect. Baryandra</i>                             | KR186510    | KR186597   | KR186770   | KR186857  | KR186944  | KR186684  | no data  | Peng P23418 (HAST)       |
| B. sp8(2)            | <i>B. sp. sect. Baryandra</i>                             | ---         | ---        | ---        | ---       | ---       | ---       | ---      | Peng 24577 (HAST)        |
| B. sublobata         | <i>B. sublobata</i> Jack                                  | ---         | ---        | ---        | ---       | ---       | ---       | ---      | Peng 24578 (HAST)        |
| B. subnummularifolia | <i>B. subnummularifolia</i> Merr.                         | KR186511    | KR186598   | KR186771   | KR186858  | KR186945  | KR186685  | no data  | Girm. DEDEN1486 (E)      |
| B. suborbiculata     | <i>B. suborbiculata</i> Merr.                             | KR186512    | KR186599   | KR186772   | KR186859  | KR186946  | KR186686  | no data  | JX656722                 |
| B. sutherlandii      | <i>B. sutherlandii</i> Hook. f.                           | KR186513    | KR186600   | KR186773   | KR186860  | KR186947  | KR186687  | no data  | Rubite R353 (PNH)        |
| B. syakaeingii1      | <i>B. syakaeingii</i> ined.                               | KR186514    | KR186601   | KR186774   | KR186861  | KR186948  | KR186688  | no data  | JX656716                 |
| B. syakaeingii2      | <i>B. syakaeingii</i> ined.                               | KR186515    | KR186602   | KR186775   | KR186862  | KR186949  | KR186689  | no data  | Jasper 1200-5 (HAST)     |
| B. tabonensis        | <i>B. tabonensis</i> C.-I Peng, R. Rubite & C. W. Lin     | KR186516    | KR186603   | KR186776   | KR186863  | KR186950  | KR186690  | no data  | Peng P23856 (HAST)       |
| B. tagbanua1         | <i>B. tagbanua</i> M. Hughes, C.-I Peng & R. Rubite       | KR186517    | KR186604   | KR186777   | KR186864  | KR186951  | KR186691  | KR187006 | Peng P23890 (HAST)       |
| B. tagbanua2         | <i>B. tagbanua</i> M. Hughes, C.-I Peng & R. Rubite       | KR186518    | KR186605   | KR186778   | KR186865  | KR186952  | KR186692  | no data  | Peng P23472 (HAST)       |
| B. taraw1            | <i>B. taraw</i> M. Hughes, C.-I Peng & R. Rubite          | KR186519    | KR186606   | KR186779   | KR186866  | KR186953  | KR186693  | KR187007 | Blanc s.n. taraw2 (E)    |
| B. taraw2            | <i>B. taraw</i> M. Hughes, C.-I Peng & R. Rubite          | KR186520    | KR186607   | KR186780   | KR186867  | KR186954  | KR186694  | no data  | Blanc s.n. taraw1 (E)    |
| B. tayabensis        | <i>B. tayabensis</i> Merr.                                | KR186521    | KR186608   | KR186781   | KR186868  | KR186955  | KR186695  | JX656718 | Rubite R360 (PNH)        |
| B. tenuibracteata    | <i>B. tenuibracteata</i> C.-I Peng, R. Rubite & C. W. Lin | KR186522    | KR186609   | KR186782   | KR186869  | KR186956  | KR186696  | no data  | Peng P23452 (HAST)       |
| B. tigrina           | <i>B. tigrina</i> Kiew                                    | KR186523    | KR186610   | KR186783   | KR186870  | KR186957  | KR186697  | KR187008 | Peng P22720 (HAST)       |
| B. trichocheila      | <i>B. trichocheila</i> Warb.                              | KR186524    | KR186611   | KR186784   | KR186871  | KR186958  | KR186698  | no data  | Peng P20764 (HAST)       |
| B. wadei             | <i>B. wadei</i> Merr. & Quisumb.                          | KR186525    | KR186612   | KR186785   | KR186872  | KR186959  | KR186699  | KR187009 | Rubite R699 (PNH)        |
| B. woodii1           | <i>B. woodii</i> Merr.                                    | KR186526    | KR186613   | KR186786   | KR186873  | KR186960  | KR186700  | KR187010 | Peng P23479 (HAST)       |
| B. woodii2           | <i>B. woodii</i> Merr.                                    | KR186527    | KR186614   | KR186787   | KR186874  | KR186961  | KR186701  | KR187011 | Peng P23496 (HAST)       |
